- Rho, myosin phosphatase and contraction in vascular smooth muscle. *Biochem J* 2006; 394(Pt 3):581–92
25. Di Salvo J, Pfitzer G, Semenchuk LA: Protein tyrosine phosphorylation, cellular  $\text{Ca}^{2+}$ , and  $\text{Ca}^{2+}$  sensitivity for contraction of smooth muscle. *Can J Physiol Pharmacol* 1994; 72:1434–9
  26. Laniyonu AA, Saifeddine M, Yang SG, Hollenberg MD: Tyrosine kinase inhibitors and the contractile action of G-protein-linked vascular agonists. *Can J Physiol Pharmacol* 1994; 72:1075–85
  27. Sabri A, Govindarajan G, Griffin TM, Byron KL, Samarel AM, Lucchesi PA: Calcium- and protein kinase C-dependent activation of the tyrosine kinase PYK2 by angiotensin II in vascular smooth muscle. *Circ Res* 1998; 83:841–51
  28. Yang SG, Saifeddine M, Laniyonu A, Hollenberg MD: Distinct signal transduction pathways for angiotensin-II in guinea pig gastric smooth muscle: Differential blockade by indomethacin and tyrosine kinase inhibitors. *J Pharmacol Exp Ther* 1993; 264:958–66
  29. Spurrell BE, Murphy TV, Hill MA: Tyrosine phosphorylation modulates arteriolar tone but is not fundamental to myogenic response. *Am J Physiol Heart Circ Physiol* 2000; 278:H373–82
  30. Jeon SB, Jin F, Kim JI, Kim SH, Suk K, Chae SC, Jun JE, Park WH, Kim IK: A role for Rho kinase in vascular contraction evoked by sodium fluoride. *Biochem Biophys Res Commun* 2006; 343:27–33
  31. Chiba Y, Takeyama H, Sakai H, Misawa M: Effects of Y-27632 on acetylcholine-induced contraction of intact and permeabilized intrapulmonary bronchial smooth muscles in rats. *Eur J Pharmacol* 2001; 427:77–82
  32. Sakai H, Nishizawa Y, Nishimura A, Chiba Y, Goto K, Hanazaki M, Misawa M: Angiotensin II induces hyperresponsiveness of bronchial smooth muscle via an activation of p42/44 ERK in rats. *Pflügers Arch* 2010; 460:645–55

## ANESTHESIOLOGY REFLECTIONS FROM THE WOOD LIBRARY-MUSEUM

### The McMechans' 1937 Loving Cup

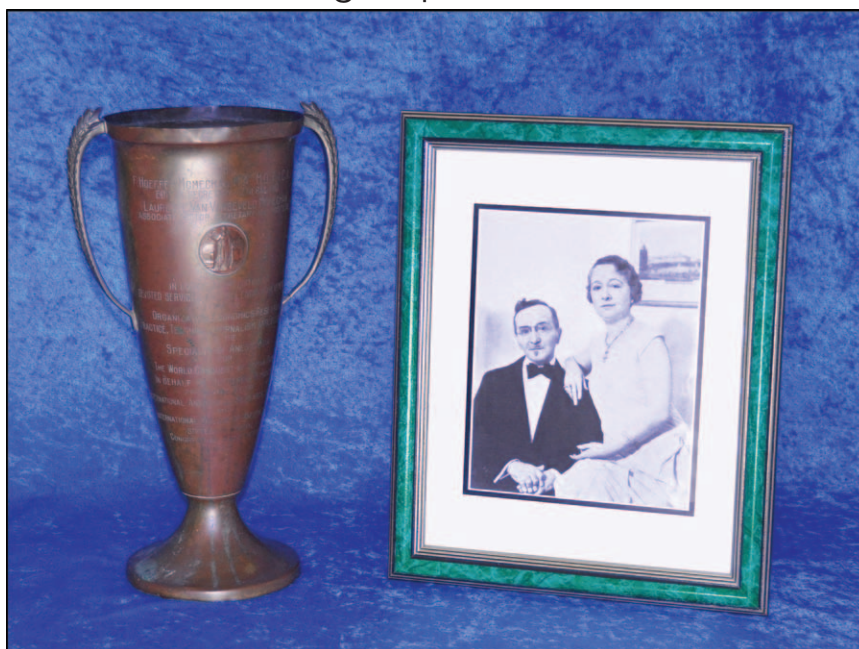

Among the many treasures that the Wood Library-Museum secures for the International Anesthesia Research Society, certainly one of the greatest is the loving cup (*left*) that the IARS had dedicated in 1937 to its founders (*right*), Dr. Francis "Frank" McMechan and his wife Laurette. Seventeen years after her husband had succumbed to complications of crippling rheumatoid arthritis, in 1956, the Widow McMechan retired from their Ohio home to southern California. The loving cup disappeared for decades until it was curatorially recovered from New Mexico in 2011. Dusting off the long-lost trophy revealed the part of the inscription thanking the McMechans for their "devoted services and splendid achievements for the organization, economics, research, practice, teaching, journalism and fellowship of the specialty of anesthesia...." (Copyright © the American Society of Anesthesiologists, Inc.)

*George S. Bause, M.D., M.P.H., Honorary Curator, ASA's Wood Library-Museum of Anesthesiology, Park Ridge, Illinois, and Clinical Associate Professor, Case Western Reserve University, Cleveland, Ohio. UJYC@aol.com.*
